# Supplementary material for: Pseudo Janus based on rhombohedral homobilayer transition metal dichalcogenides
Source: Royal Society of Chemistry journal article supplement (doi:10.1039/d2tc02227c), 2022-01-01
Supplement: d2tc02227c1.pdf [file d2tc02227c1.pdf]

*Supporting information for*

**Pseudo Janus Based on Rhombohedral Homobilayer Transition  
Metal Dichalcogenides**

Changqing Lin<sup>1,#</sup>, Hui Xiang<sup>3,#</sup>, Heqi Xiong<sup>1</sup>, Sohail Ahmad<sup>5</sup>, Bo Xu<sup>4\*</sup>, Puqin  
Zhao<sup>2\*</sup>, Yingchun Cheng<sup>1\*</sup>

<sup>1</sup> Key Laboratory of Flexible Electronics & Institute of Advanced Materials, Jiangsu National Synergetic Innovation Center for Advanced Materials, Nanjing Tech University, 30 South Puzhu Road, Nanjing 211816, China

<sup>2</sup> School of Physical and Mathematical Sciences, Nanjing Tech University, 30 South Puzhu Road, Nanjing 211816, China

<sup>3</sup> School of Mathematics and Physics, Hubei Polytechnic University, Huangshi, 435003, P. R. China

<sup>4</sup> School of Science and Key Laboratory of Biomedical Functional Materials, China Pharmaceutical University, Nanjing 211198, P. R. China

<sup>5</sup> Department of Physics, College of Science, P O Box 9004, King Khalid University, Abha, Saudi Arabia

# contribute equally to this work.

\*To whom correspondence should be addressed.

E-mail: [xubo@cpu.edu.cn](mailto:xubo@cpu.edu.cn); [putaochen@njtech.edu.cn](mailto:putaochen@njtech.edu.cn); [iamyccheng@njtech.edu.cn](mailto:iamyccheng@njtech.edu.cn)

**Keywords:** rhombohedral bilayer, electric polarization, piezoelectricity, spin-dipole locking effect, Rashba splitting

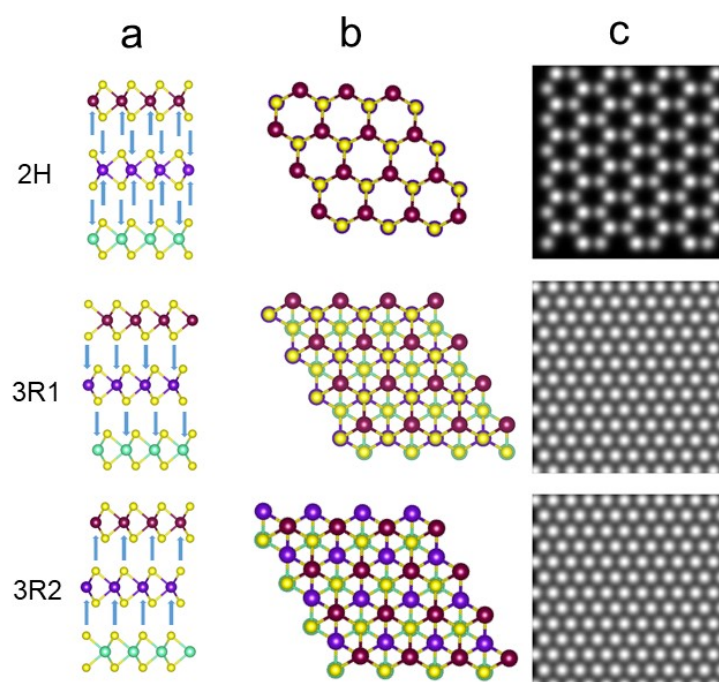

Figure S1. The structure and simulated HRTEM images for 2H and two 3R stacking tri-layer MoS<sub>2</sub>. (a) Side view and (b) top view of three stacking trilayer MoS<sub>2</sub>. (c) Simulated HRTEM of three tri-layer MoS<sub>2</sub> from top view.

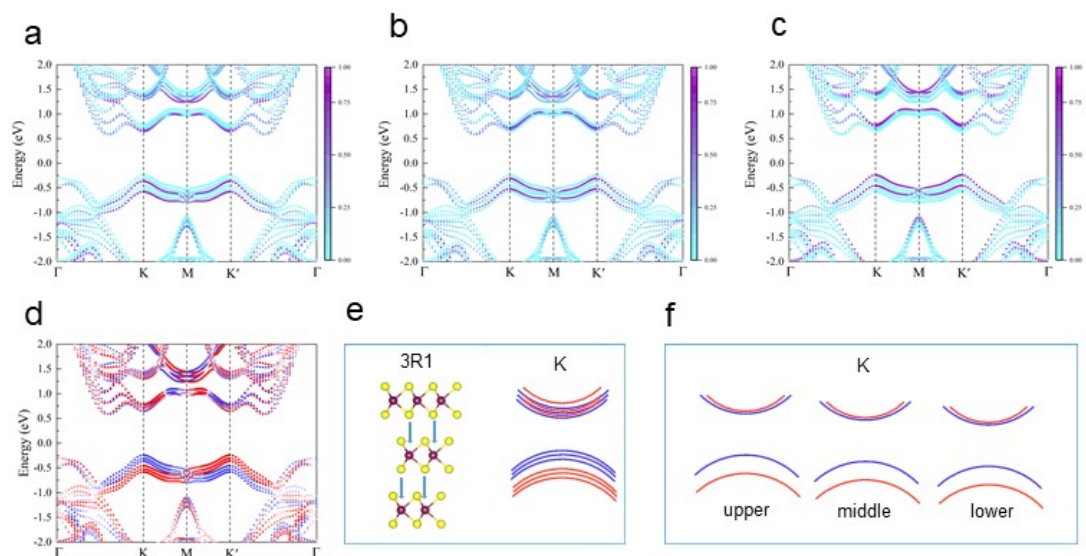

Figure S2. Layer and spin projected band structure of tri-layer MoS<sub>2</sub>. (a-c) Lower, middle, and upper layer projected band structure of tri-layer MoS<sub>2</sub>. (d) Spin  $s_z$  projected band structure of tri-layer MoS<sub>2</sub>. (e) Scheme of valence band and conduction band edges around K point for tri-layer MoS<sub>2</sub>. (f) Layer and spin projected states for tri-layer MoS<sub>2</sub>.

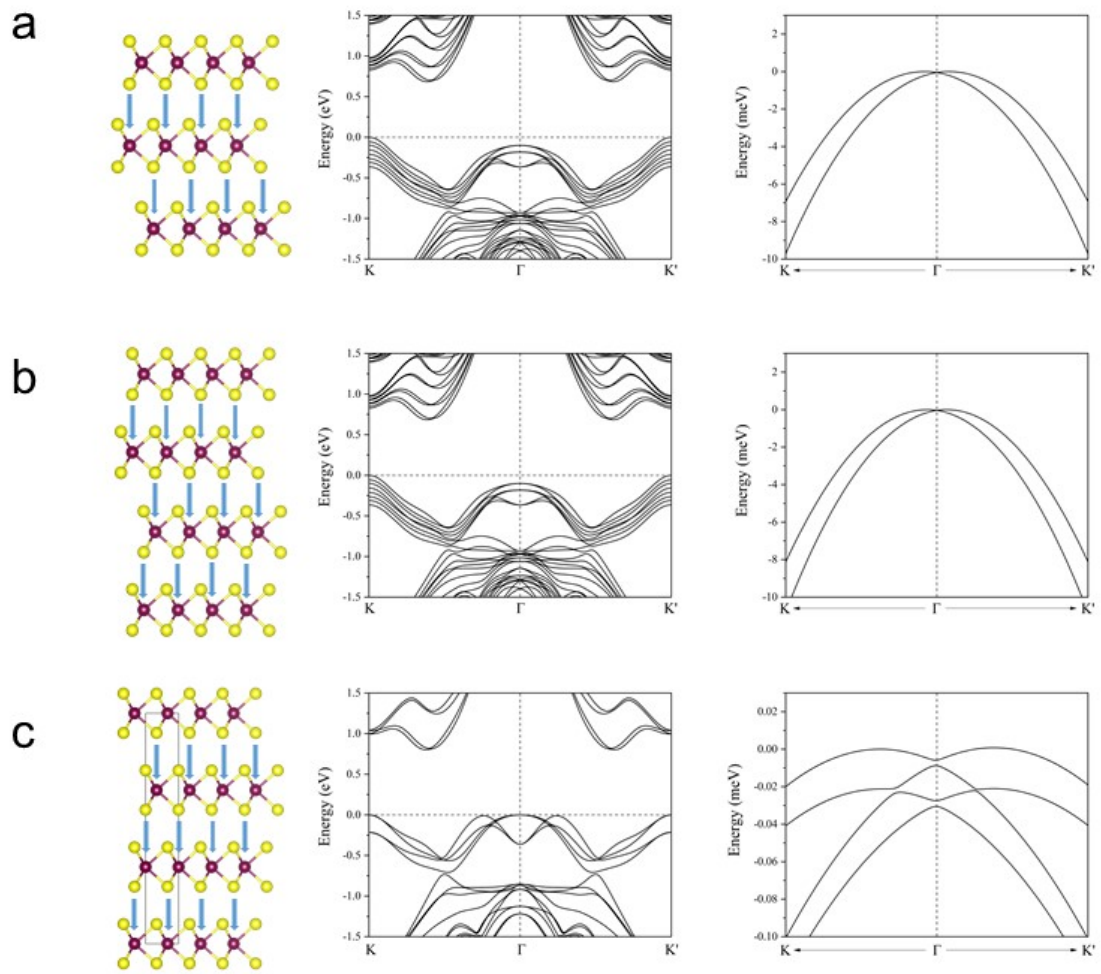

Figure S3. Rashba splitting of (a) tri-layer, (b) quadra-layer and (c) bulk 3R MoTe<sub>2</sub>.
